# Supplementary material
Source: ML conference proceedings conference paper supplement (https://openaccess.thecvf.com/content/ICCV2025/html/Liu_Keyframe-oriented_Vision_Token_ICCV_2025_paper.html)
Supplement: Supplementary file 1 [file ICCV_2025_KVTP_SUP.pdf › supplementary/ICCV_2025_KVTP_SUP.pdf]

## A. Constructed Data Sample and Prompting Details

To provide a clear understanding of our data construction process, we present a constructed data sample from the SKV-QA dataset along with the corresponding prompts used for caption generation and GPT-based scoring.

### A.1. Constructed Data Sample

```
1 {
2   "path":
3     "/home/yl817/LLaVA-NeXT/hf_data/
4     nextqa/NEXTVideo/2574374895.mp4",
5   "question": "what did the baby do
6     after throwing the green cup away
7     while on the floor near the end A.
8     clap proudly B. the lady sitting
9     down C. lay on floor D. just
10    picked it up E. crawl",
11   "debiased_question": "What did the
12     baby do after throwing the green
13     cup? Choices: Clap, Sit, Lay, Pick
14     up, Crawl.",
15   "captions": "{
16     '[0, 7]': 'The clip begins with a
17       child sitting in a blue chair,
18       holding a green cup with a
19       white G on it. The child is
20       wearing a white shirt with
21       colorful text and patterned
22       shorts. The background shows a
23       room with a bed that has a
24       colorful blanket and some books
25       or papers on it. The child
26       appears to be playing with the
27       cup, moving it around and
28       looking at it. The child then
29       leans forward, reaching towards
30       the floor, possibly to pick
31       something up or to place the
32       cup down. The child continues
33       to hold the cup while leaning
34       forward. The scene remains
35       consistent throughout the clip,
36       with the child focused on the
37       cup and the room's background
38       unchanged.',
39     '[8, 15]': 'The clip begins with a
40       child in a white shirt and
41       patterned shorts, crawling on
42       an orange play mat. The child
43       is reaching towards a blue toy
44       chest adorned with colorful
45       cartoon characters. The
46       background includes a wooden
47       cabinet with various items on
48       top. As the child continues to
49       crawl, they reach for a green
50       cylindrical object on the
51       floor. The scene progresses
52       with the child still on the
53       play mat, now closer to the
54       green object. The child appears
55       to be focused on the object,
```

```
possibly attempting to pick it
up or interact with it. The
background remains consistent,
showing the same wooden cabinet
and items on top. The clip
concludes with the child still
engaged with the green object,
maintaining their focus on it.',
'[16, 23]': 'The clip begins with a
child sitting on an orange
floor, facing away from the
camera. The child is wearing a
white shirt and appears to be
playing with a green object in
their hands. In the background,
there is a blue couch and a
black object on the floor. As
the clip progresses, the child
continues to play with the
green object, occasionally
looking around. The child then
reaches for the black object on
the floor and picks it up. The
clip concludes with the child
holding the black object in
their hand, while still sitting
on the orange floor.',
'[24, 29]': 'The clip begins with a
child in a white shirt and
colorful pants crawling on an
orange floor. The background
includes a blue piece of
furniture and a patterned
blanket. The child appears to
be moving towards the
furniture. The scene then
transitions to the child lying
on a patterned blanket, still
wearing the same clothes, and
seems to be resting or playing
on the floor. A green cup is
visible near the child. The
child then starts to move,
rolling over and sitting up
slightly. The background
remains consistent with the
blue furniture and patterned
blanket. The child continues to
move around on the floor,
occasionally looking around and
adjusting their position.'
}",
"relevance_score": "{[24,29]: 4}"
}
```

Listing 1. Augmented data sample from SKV-QA

### A.2. Caption Generation Prompt

```
1 System Prompt:\n### Task:\nYou are an
expert in understanding scene
transitions based on visual features
in a video. You are requested to
create the descriptions for the
```

```

current clip sent to you, which
includes multiple sequential frames.
2 ### Guidelines For Clip Description:\n-
  Analyze the narrative progression
  implied by the sequence of frames,
  interpreting the sequence as a whole.
3 - Note that since these frames are
  extracted from a clip, adjacent
  frames may show minimal differences.
4 - When referring to people, use their
  characteristics, such as clothing, to
  distinguish different people.
5 - **IMPORTANT** Please provide as many
  details as possible in your
  description, including colors,
  shapes, and textures.
6 ### Output Format:
7 Your response should look like this: The
  clip begins with..., progresses
  by..., and concludes with...

```

### A.3. GPT Scoring Prompt

```

1 You are provided with descriptions of
  segments from a video. Each segment
  is labeled with a starting and ending
  frame index and a description of the
  events in that segment.
2 ### Instructions
3 1. Identify the relevancy between each
  segment and the question, assigning a
  score from 0 to 5 for all segments.
4 - 0 represents no relevancy, and 5
  represents the most relevant.
5 2. Sometimes the question may not be
  explicitly relevant to the
  descriptions. Consider the potential
  connection behind it.
6 3. Only return the starting and ending
  frame index for all segments and
  their corresponding scores.
7 4. Be mindful of the temporal
  relationship between segments and the
  question when scoring.
8 ### Output Format
9 Return the answer as a dictionary-like
  string:
10 Example output:
11 {[0,6]:3,[7,20]:5}

```

## B. More Qualitative result

In this section, we present additional comparisons among standard token pruning, keyframe selection pipelines, and KVTP on LLaVA-Video-7B. To clearly highlight the differences, we sample eight representative frames from each video. The visualizations demonstrate that KVTP effectively preserves the complete scenes of events, leading to correct video reasoning outcomes while maintaining the same pruning rate.

## C. Ablation study on context fusion head

To verify the effectiveness of context fusion head, we ablated the context fusion head and observed a clear performance drop, confirming its effectiveness. This ablation is conducted on the KVTP+Prumerge pipeline.

|          | VideoMME | EgoSchema | NeXT-QA |
|----------|----------|-----------|---------|
| w/ head  | 63.3     | 54.7      | 76.7    |
| w/o head | 61.7     | 53.2      | 75.6    |

Table 6. Ablation study of the context fusion head on three SKV-QA subsets.

## D. Results on the full datasets

To validate the generalizability of our method, we evaluated our method on the full versions of the three main datasets, along with two additional long-form datasets (*LongVideoBench* and *MVLU*), showing consistent improvements and confirming generalizability.

|                      | 1           | 2           | 3           | 4           | 5           | FLOPs |
|----------------------|-------------|-------------|-------------|-------------|-------------|-------|
| LLaVA-Video-7B       | 63.3        | 57.3        | 83.2        | 70.8        | 58.2        | 100%  |
| PruMerge             | 59.6        | 54.1        | 78.2        | 64.1        | 52.8        | 36%   |
| KeyVideoLLM          | 52.1        | 51.9        | 73.5        | 61.9        | 50.0        | 36%   |
| FastV                | <u>61.8</u> | <u>56.7</u> | <b>81.8</b> | <u>66.1</u> | <u>56.7</u> | 64%   |
| KVTP+Prumerge (ours) | <b>62.7</b> | <b>57.2</b> | <u>80.5</u> | <b>66.2</b> | <b>57.3</b> | 36%   |

Table 7. Evaluation results on five datasets: 1 = VideoMME, 2 = EgoSchema, 3 = NeXT-QA, 4 = MVLU, 5 = LongVideoBench.

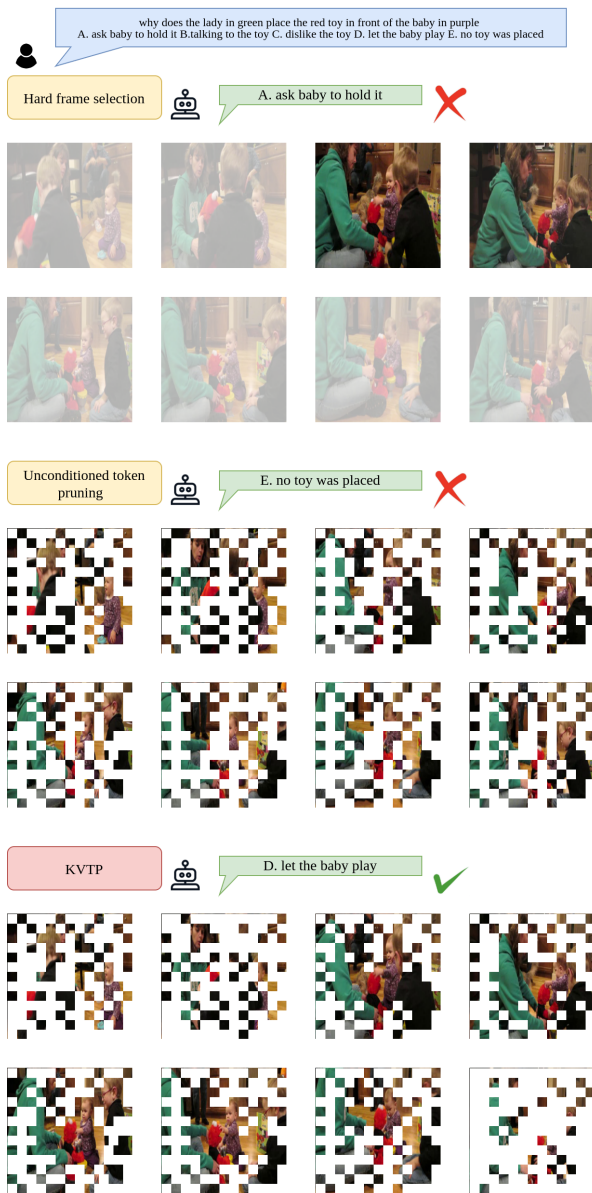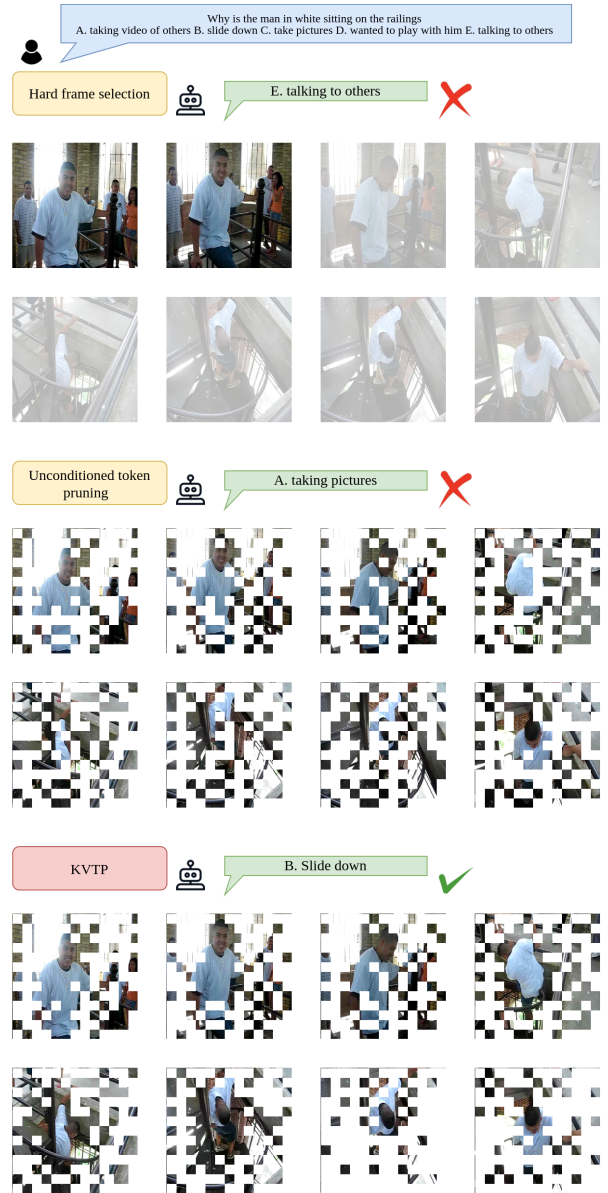

Figure 8. Qualitative results on LLaVA-Video-7B.
